# Supplementary material
Source: publisher figshare collection journal article supplement (https://acs.figshare.com/ndownloader/files/12579758)
Supplement: Supplementary file 1 [file 12579758]

## Supporting Information

### **A Nano-Protein Functionalized Hierarchical Composite Air-filter**

Xin Fan<sup>†,‡,§</sup>, Yu Wang<sup>\*§</sup>, Lushi Kong<sup>l</sup>, Xuewei Fu<sup>§</sup>, Min Zheng<sup>§</sup>, Tian Liu<sup>§</sup>,  
Wei-Hong Zhong<sup>\*§</sup>, Siyi Pan<sup>\*†,‡</sup>

Number of pages: 3

Number of figures: 5

Number of tables: 0

## Table of Contents

### **List of Figures:**

|                                                                                                  |           |
|--------------------------------------------------------------------------------------------------|-----------|
| <b>Figure S1.</b> SEM images of pristine whey protein concentrate at different magnifications... | <b>S3</b> |
| <b>Figure S2.</b> SEM images of bacterial cellulose (BC) at different magnifications.....        | <b>S3</b> |
| <b>Figure S3.</b> (a) SEM image of D-WPC@BC sample. (b) Diameter distribution of D-WPC..         | <b>S3</b> |
| <b>Figure S4.</b> (a) SEM image of WP fabric, (b) pore size distribution of WP.....              | <b>S4</b> |
| <b>Figure S5.</b> The pressure drop of D-WPC/WP, BC/WP and D-WPC@BC/WP samples .....             | <b>S4</b> |

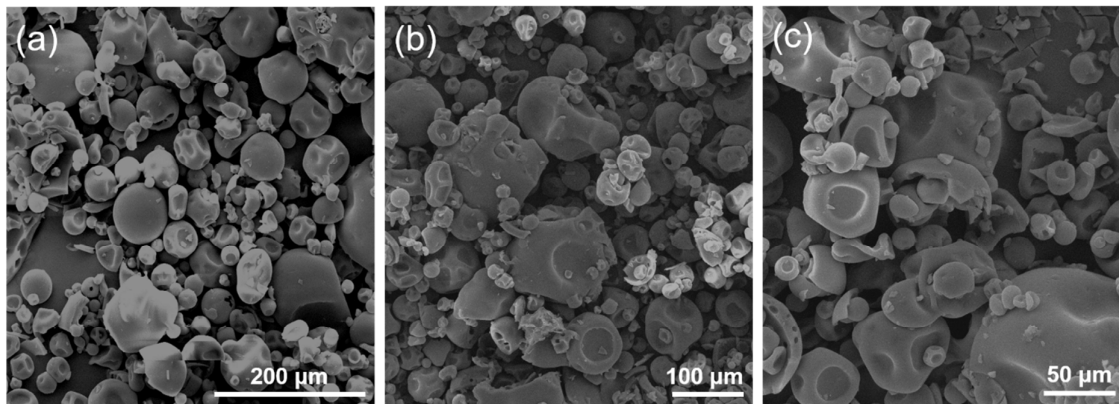

**Figure S1.** SEM images of pristine whey protein concentrate at different magnifications.

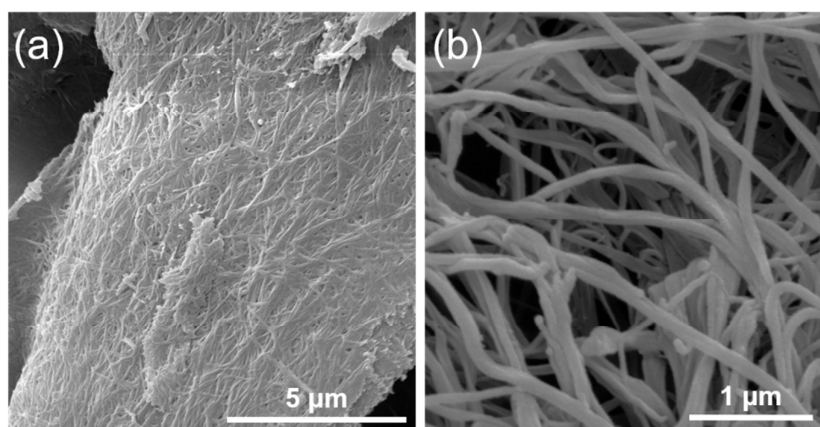

**Figure S2.** SEM images of pristine bacterial nano-cellulose (BC) at different magnifications.

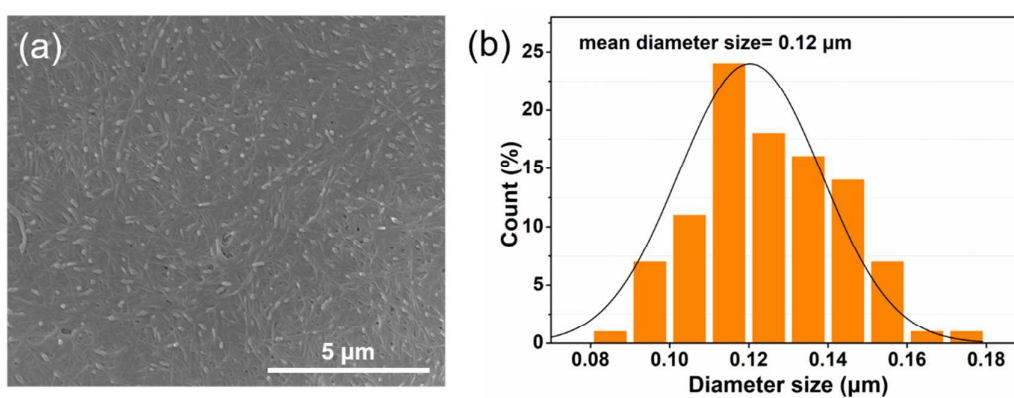

**Figure S3.** (a) SEM image of D-WPC@BC sample. (b) Diameter distribution of D-WPC.

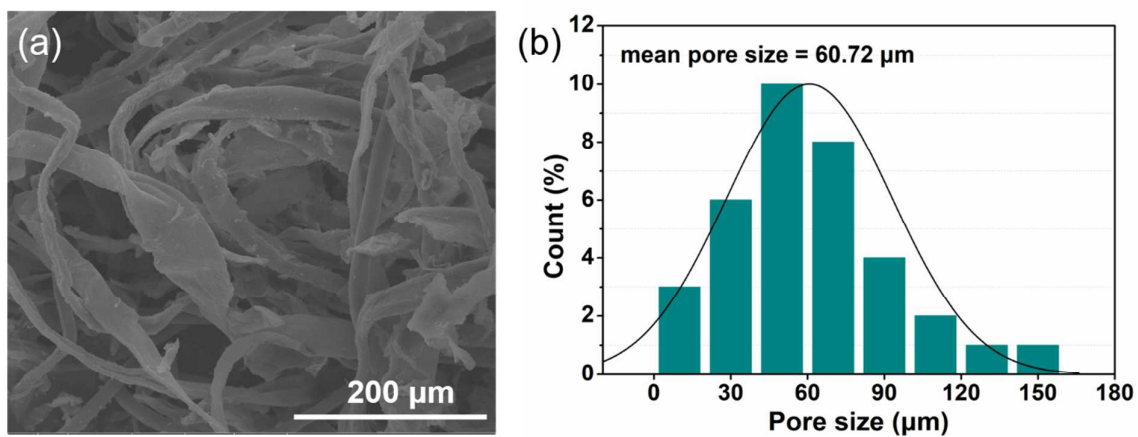

**Figure S4.** (a) SEM image of WP fabric, (b) pore size distribution of WP.

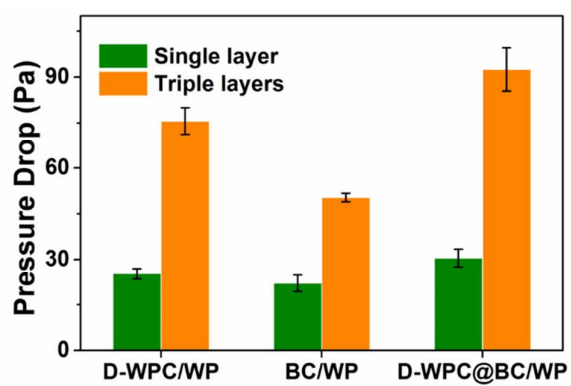

**Figure S5.** The pressure drop of D-WPC/WP, BC/WP and D-WPC@BC/WP samples.
